# Supplementary material for: Reviews and syntheses: Contribution of sulfate to methane oxidation in upland soils: a mini-review
Source: Copernicus journal article supplement (doi:10.5194/egusphere-2024-3347), 2024-11-29
Supplement: Supplementary file [file egusphere-2024-3347-RC3-supplement.pdf]

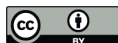

## Reviews and syntheses: Contribution of sulfate to methane oxidation in upland soils: a mini-review

Rui Su<sup>1</sup>, Kexin Li<sup>2,3</sup>, Nannan Wang<sup>2</sup>, Fenghui Yuan<sup>2</sup>, Ying Zhao<sup>1</sup>, Yunjiang Zuo<sup>2</sup>, Ying Sun<sup>2</sup>, Liyuan  
5 He<sup>4</sup>, Xiaofeng Xu<sup>4\*</sup>, Lihua Zhang<sup>1,2,5\*</sup>

<sup>1</sup>College of Life and Environmental Sciences, Minzu University of China, Beijing, 100081, China

<sup>2</sup>Key Laboratory of Wetland Ecology and Environment, Northeast Institute of Geography and  
Agroecology, Chinese Academy of Sciences, Changchun, Jilin, 130102, China

10 <sup>3</sup>University of Chinese Academy of Sciences, Beijing, 100049, China

<sup>4</sup>Biology Department, San Diego State University, San Diego, CA, 92182, USA

<sup>5</sup>State Key Laboratory of Vegetation and Environmental Change, Institute of Botany, Chinese  
Academy of Sciences, Beijing 100093, China

15 Corresponding authors: L.Z. ([zhanglihua@muc.edu.cn](mailto:zhanglihua@muc.edu.cn)); X.X. ([xxu@sdsu.edu](mailto:xxu@sdsu.edu))

**Abstract.** Methane (CH<sub>4</sub>) is a potent greenhouse gas, its global warming potential is  
25 times higher than carbon dioxide (CO<sub>2</sub>), and various environmental factors influence  
CH<sub>4</sub> oxidation in soil. Sulfate (SO<sub>4</sub><sup>2-</sup>) ion is the main component of atmospheric  
20 deposition and has been increasing in recent years, it promotes CH<sub>4</sub> production and  
anaerobic CH<sub>4</sub> oxidation, however, **the impact of SO<sub>4</sub><sup>2-</sup> on CH<sub>4</sub> oxidation remains  
inconclusive.** Due to the limited research on the effects of SO<sub>4</sub><sup>2-</sup> on CH<sub>4</sub> oxidation, we  
synthesize current research on the effects of SO<sub>4</sub><sup>2-</sup> on CH<sub>4</sub> oxidation, examining both  
its direct impact and its influence on the dynamics of soil substances, and the potential  
25 indirect effects of SO<sub>4</sub><sup>2-</sup> on CH<sub>4</sub> oxidation. Through a literature review, we identified  
that SO<sub>4</sub><sup>2-</sup> facilitates CH<sub>4</sub> oxidation within a range of 3-42%, moreover, it has been  
found that various physicochemical properties and processes in the soil are influenced  
by the addition of SO<sub>4</sub><sup>2-</sup>, which in turn affects CH<sub>4</sub> oxidation. This review enhances our  
understanding of the role of SO<sub>4</sub><sup>2-</sup> in promoting CH<sub>4</sub> oxidation and lays the foundation  
30 for future studies aimed at validating these findings by quantifying CH<sub>4</sub> flux and  
oxidation rates, as well as elucidating the underlying microbial processes via  
experimental research. **This review deepens the comprehension of atmospheric CH<sub>4</sub>  
flux and the global CH<sub>4</sub> cycle, particularly in the context of potential global  
environmental changes.**



35

## 1 Introduction

CH<sub>4</sub> is an important greenhouse gas and has increased since pre-industrial times (Place, 2024; Praeg et al., 2016). Its global warming potential is 25 times higher than carbon dioxide (CO<sub>2</sub>) owing to its superior heat absorption efficiency (Yang et al., 2023).

40 Methanotrophs consume CH<sub>4</sub> under aerobic conditions (Le Mer and Roger, 2001), reducing CH<sub>4</sub> atmospheric concentration (Singh et al., 2010). Consequently, methanotrophs are crucial microbes that play an indispensable role in regulating and mitigating the greenhouse effect on Earth. Soil CH<sub>4</sub> oxidation is the sole known biological sink for atmospheric CH<sub>4</sub> (Ho et al., 2019; Murguia-Flores et al., 2018),

45 contributing to 5%–7% of the global annual atmospheric CH<sub>4</sub> uptake (Murguia-Flores et al., 2021). Upland soils are the primary biological CH<sub>4</sub> sink (Bodelier, 2011; Guo et al., 2023), owing to methanotroph-mediated CH<sub>4</sub> consumption reaching approximately 30 teragrams per year (Tg yr<sup>-1</sup>). This represents the second-largest atmospheric CH<sub>4</sub> consumption sink, surpassed only by hydroxyl radicals depletion (Deng et al., 2019).

50 CH<sub>4</sub> oxidation in soil is influenced by many factors, such as soil water content, soil texture, soil type, temperature, soil pH, soil inorganic nitrogen content, metal availability, etc. (Shukla et al., 2013). The ion SO<sub>4</sub><sup>2-</sup>, a significant ion component of acid deposition, may also significantly impact CH<sub>4</sub> oxidation.

55 Sulfur is transferred into the earth's surface through dry and wet deposition, with SO<sub>4</sub><sup>2-</sup> being the dominant form. SO<sub>4</sub><sup>2-</sup> deposition induces soil acidification (Huang et al., 2019), alters soil plant diversity (Li et al., 2022), affects microbial properties (Wang et al., 2018), limits grass yield potential (Klessa et al., 1989), and influences greenhouse gas emissions (Fan et al., 2017; Gauci et al., 2004; Schimel, 2004). The cycling of SO<sub>4</sub><sup>2-</sup>

60 and CH<sub>4</sub> exhibits a significant inter-relationship. SO<sub>4</sub><sup>2-</sup> suppresses CH<sub>4</sub> production (methanogenesis) primarily due to its thermodynamic and kinetic preference as an electron acceptor (Granberg. et al., 2001; Schimel, 2004), leading to decreased CH<sub>4</sub> emissions (Gauci et al., 2004). SO<sub>4</sub><sup>2-</sup> has been shown to facilitate anaerobic CH<sub>4</sub>



oxidation in diverse ecosystems, such as oceans (Boetius et al., 2000), wetlands (La et  
65 al., 2022), and paddy fields (Fan et al., 2021), acting as a crucial electron acceptor.  
However, there is still a lack of a comprehensive review that summarizes the impact of  
 $\text{SO}_4^{2-}$  on soil **CH<sub>4</sub> oxidation**, a process that significantly contributes to reducing  
atmospheric CH<sub>4</sub> concentrations.

70 Previous studies indicated that  $\text{SO}_4^{2-}$  addition may promote **CH<sub>4</sub> oxidation** by  
modulating the community structure or activity of methanotrophs in soils (Bradford et  
al., 2001b; Sitaula et al., 1995), while some studies indicated no significant impact on  
CH<sub>4</sub> oxidation (Bradford et al., 2001a). Upon reviewing the literature, we found that  
the enhancement of  $\text{SO}_4^{2-}$  on CH<sub>4</sub> oxidation is prominent **in numerous studies**.  
75 Furthermore,  $\text{SO}_4^{2-}$  facilitates CH<sub>4</sub> oxidation within a range of **3-42%** (Table 1). Thus,  
we hypothesize that  $\text{SO}_4^{2-}$  may stimulate CH<sub>4</sub> oxidation. Nonetheless, the scarcity of  
data precludes a definitive conclusion regarding the direct effect of  $\text{SO}_4^{2-}$  on CH<sub>4</sub>  
oxidation. Further, we reviewed references about the influence of  $\text{SO}_4^{2-}$  on soil  
properties, substances, or biochemical processes, aiming to elucidate any indirect effect  
80 on CH<sub>4</sub> oxidation through variations in soil substances or processes. Indeed, we find  
that  $\text{SO}_4^{2-}$  may affect CH<sub>4</sub> oxidation both directly and indirectly. Based on the available  
literature, we infer that  $\text{SO}_4^{2-}$  favors CH<sub>4</sub> oxidation. **This review provides a  
comprehensive summary of the direct and potential indirect impacts** of  $\text{SO}_4^{2-}$  on CH<sub>4</sub>  
oxidation. The review underscores the viability of investigating the effect of  $\text{SO}_4^{2-}$  on  
85 CH<sub>4</sub> oxidation, providing a valuable reference for future experimental research. **We will  
experimentally identify the enhancement of CH<sub>4</sub> oxidation following  $\text{SO}_4^{2-}$  addition,  
along with elucidating the underlying microbial processes. This will contribute to a  
deeper understanding of the global CH<sub>4</sub> cycling in the context of increasing acid  
deposition in the future.**

90

## **2 The microbial CH<sub>4</sub> oxidation processes**

### **2.1 CH<sub>4</sub> oxidation processes**



Upland soils serve as sinks for atmospheric CH<sub>4</sub>, contributing about 6% to the total atmospheric CH<sub>4</sub> consumption (Liu and Greaver, 2009). Aerobic CH<sub>4</sub> oxidation, mediated by aerobic methanotrophs (Chistoserdova et al., 2005), occurs in uplands, including grasslands (Kou et al., 2017; Zhang et al., 2020), forests (Jang et al., 2011; Mohanty et al., 2007), and agricultural soils (Ho et al., 2019), with oxygen serving as final electron acceptor. Soil CH<sub>4</sub> oxidation contributes the largest biological sink for atmospheric CH<sub>4</sub> (Pratscher et al., 2018). Moreover, the highest methanotrophic activity is observed in the 6-10 cm layer of surface soil (King and Schnell, 1998; Nanba and King, 2000; Schnell and King, 1994). Methanotrophs oxidize CH<sub>4</sub> through dissimilatory and assimilatory pathways (Mancinelli, 1995). CH<sub>4</sub> is ultimately oxidized to CO<sub>2</sub> through the production of a series of intermediate substances (Fig. 1). In the dissimilatory pathways, CH<sub>4</sub> undergoes sequential oxidation: first, it is oxidized by MMO to methanol (CH<sub>3</sub>OH, Fig. 1, path ①); methanol is oxidized by methanol dehydrogenase (MDH) to formaldehyde (HCOH, Fig. 1, path ②); formaldehyde is then oxidized by formaldehyde dehydrogenase (FADH) to formate (HCOOH, Fig. 1, path ③); and finally, formate is oxidized by formate dehydrogenase (FDH) to CO<sub>2</sub> (Fig. 1, path ④). Formaldehyde, a crucial intermediate in CH<sub>4</sub> oxidation, can be assimilated by methanotrophs to produce cellular biomass. The assimilating of formaldehyde occurs primarily through two pathways: the ribulose monophosphate (RuMP) cycle (Fig.1 path ⑤) and the serine cycle (Fig.1 path ⑥) (Kang and Lee 2016). As an aerobic CH<sub>4</sub> oxidation, CO<sub>2</sub>, water (H<sub>2</sub>O), and microbial biomass are ultimately produced, and the net reaction can be described as:

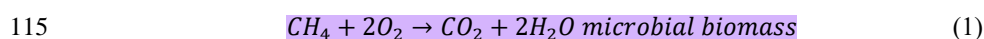

## 2.2 Methanotrophs

Methanotrophs constitute a distinct subset of methylotrophs, uniquely dependent on the one-carbon compound CH<sub>4</sub> as their sole source of carbon and energy (Hanson and Hanson, 1996). Aerobic methanotrophs belong to various phyla, including *Proteobacteria*, *Verrucomicrobia* (Koo and Rosenzweig, 2021), and *Actinobacteria*. Proteobacterial methanotrophs are classified into type I, type II, and type X (Li et al.,



2020), based on their cell membrane arrangement, chemotaxonomic properties, physiological characteristics, and phylogenetic location. Type I and type X  
125 methanotrophs belong to the *γ-Proteobacteria* class, while type II methanotrophs belong to the *α-Proteobacteria* class (Hanson and Hanson, 1996). Type I methanotrophs assimilate carbon using the RuMp pathway, type II methanotrophs using the serine pathway, and type X methanotrophs can use both pathways (Hanson and Hanson, 1996; Mancinelli, 1995). Verrucomicrobial methanotrophs, a newly discovered  
130 methanotrophs group (Op den Camp et al., 2009), are acidophilic and thermophilic extremophiles (Schmitz et al., 2021). They lack intracytoplasmic membranes, possess primarily saturated phospholipids, and use the serine and Calvin-Benson-Bassham for carbon fixation (Koo and Rosenzweig, 2021; Op den Camp et al., 2009). The actinobacterial methanotrophs, *Candidatus Mycobacterium methanotropicum*, has  
135 only recently been discovered and is preferred in low-pH and high-CH<sub>4</sub> environments (van Spanning et al., 2022). This group of methanotrophs expresses a comprehensive set of enzymes essential for aerobic CH<sub>4</sub> oxidation and uses the RuMp cycle to fix formaldehyde (van Spanning et al., 2022).

140 Type I and type X methanotrophs belong to the *Methylococcaceae* family, where type II methanotrophs belong to two distinct families: *Methylocystaceae* and *Beijerinckiaceae* (Bowman, 2006; Yun et al., 2012). Verrucomicrobial methanotrophs are classified under the *Methylacidiphilaceae* family (Op den Camp et al., 2009). Up to now, a total of 21 genera and a species of methanotrophs have been identified, of which  
145 20 genera belong to the *Proteobacteria*. Type I methanotrophs include *Methylomonas*, *Methylobacter*, *Methylomicrobium*, *Methylosphaera*, *Methylosarcina*, *Methylohalobius*, *Methylothermus*, *Crenothrix*, *Clonothrix*, *Methylosoma*, *Methylovulum*, *Methylogaea*, and *Methylomarinum*. Type II methanotrophs include *Methylocystis*, *Methylosinus*, *Methylocella*, *Methylocapsa* and *Methyloferula*. Type X methanotrophs include  
150 *Methylococcus* and *Methylocaldum*. Verrucomicrobial methanotrophs consist of the genus *Methylacidiphilum* (Cai et al., 2022; Fenibo et al., 2023; Hanson and Hanson, 1996; Op den Camp et al., 2009). The recently discovered species *Candidatus M.*



methanotrophicum is classified with the *Mycobacterium* genus (van Spanning et al., 2022). There are two forms of MMOs, soluble cytoplasmic type monooxygenase (sMMO) and particulate membrane-bound type monooxygenase (pMMO) (Koo and Rosenzweig, 2021). Figure 1 illustrates the differences between pMMO and sMMO, and their distribution across the identified 21 genera. The activity of methanotrophs is influenced by various environmental and climatic factors (Deng et al., 2019) and positively correlated with CH<sub>4</sub> oxidation (Tate, 2015).

160

### 2.3 The influence of sulfate

Acid rain pollution has been a significant environmental issue (Chen et al., 2020; Qi et al., 2022). SO<sub>4</sub><sup>2-</sup> is the major ion in acid rain (Wright and Henriksen, 1978) and has profound impacts on substances and biochemical processes in soils. As a crucial component of terrestrial ecosystems, soils serve as the ultimate receptor of acid deposition. The deposition of SO<sub>4</sub><sup>2-</sup> can have numerous adverse effects on soil properties and functions. The application of SO<sub>4</sub><sup>2-</sup> treatments led to a decrease in soil pH, as well as a reduction in the activities of soil enzymes such as cellulase, invertase, and polyphenol oxidase (Tie et al., 2020). The addition of SO<sub>4</sub><sup>2-</sup> increased microbial biomass carbon (MBC), microbial biomass nitrogen (MBN), and enzyme activities in the forest floor (Wang et al., 2018). SO<sub>4</sub><sup>2-</sup> promoted methylation of mercury to form methylmercury (Jeremiason et al., 2006). However, the generation of methylmercury is influenced by various factors, including oxygen levels, temperature, pH, and the availability of labile organic carbon (Munthe et al., 2007). The significance of the impact of SO<sub>4</sub><sup>2-</sup> on the CH<sub>4</sub> cycle lies in its ability to influence both methanogenesis and anaerobic CH<sub>4</sub> oxidation. The addition of SO<sub>4</sub><sup>2-</sup> to soil competitively displaced methanogens with sulfate-reducing bacteria (Granberg. et al., 2001), thus inhibiting CH<sub>4</sub> production (Eriksson et al., 2010; Granberg. et al., 2001). The anaerobic CH<sub>4</sub> oxidation process, fueled by SO<sub>4</sub><sup>2-</sup>, is a crucial mechanism for mitigating methane emissions from flooded ecosystems (Boetius et al., 2000; Fan et al., 2021; La et al., 2022), as sulfate (SO<sub>4</sub><sup>2-</sup>) functions as the electron acceptor during anaerobic CH<sub>4</sub> oxidation. However, a comprehensive review of the influence of SO<sub>4</sub><sup>2-</sup> on aerobic CH<sub>4</sub>

180



oxidation remains lacking. Therefore, synthesizing the literature regarding the influence  
of  $\text{SO}_4^{2-}$  on  $\text{CH}_4$  oxidation is crucial for comprehending methane cycling in the context  
185 of  $\text{SO}_4^{2-}$ .

### 3 Soil $\text{CH}_4$ oxidation in response to $\text{SO}_4^{2-}$ addition

In a temperate mixed deciduous woodland, the cumulative uptake of  $\text{CH}_4$  oxidation was  
observed to be 25% higher in the experimental group with  $\text{H}_2\text{SO}_4$  addition compared to  
190 the control group during the final quarter of the study period (Bradford et al., 2001b).  
This increase in  $\text{CH}_4$  oxidation could be attributed to alterations in the activity or  
community structure of methanotrophs caused by the addition of  $\text{H}_2\text{SO}_4$  (Bradford et  
al., 2001b; Sitaula et al., 1995). In Sitaula's study, the experimental group treated with  
 $\text{H}_2\text{SO}_4$  exhibited the lowest pH, specifically a pH of 3, at which the  $\text{CH}_4$  oxidation rate  
195 was observed to be the highest (Sitaula et al., 1995). However, given the addition of  
 $\text{H}_2\text{SO}_4$  in both experiments, it remains unclear whether the observed enhancement in  
 $\text{CH}_4$  oxidation is primarily due to the decreased pH or the increased concentration of  
 $\text{SO}_4^{2-}$  ions. **Despite variable responses to pH in the temperate forest, a general trend  
indicates that  $\text{CH}_4$  consumption trends increase with higher pH values (Brumme and  
200 Borken, 1999; Silver et al., 1999).** Furthermore, considering that the experimental soils  
were temperate forest and acidic (Bradford et al., 2001b; Sitaula et al., 1995), it is  
plausible that methanotrophs have adapted to these acidic conditions, potentially having  
a lower optimal pH range for  $\text{CH}_4$  oxidation compared to non-acid soils. In a field  
experiment, a lower pH has been shown to increase  $\text{CH}_4$  oxidation (Bradford et al.,  
205 2001b; Sitaula et al., 1995). Additionally, if the hypothesis that  $\text{SO}_4^{2-}$  potentially  
facilitates  $\text{CH}_4$  oxidation holds, high-pH soils are resilient to  $\text{SO}_4^{2-}$  adsorption post-  
sulfur deposition, thereby enabling acidic soils to absorb more  $\text{SO}_4^{2-}$  compared to  
alkaline soils. Consequently, more  $\text{SO}_4^{2-}$  is desorbed and transported in acidic soils,  
**which could further augment  $\text{CH}_4$  oxidation (Prietz et al., 2004).**

210

The promotional effect of  $\text{SO}_4^{2-}$  on  $\text{CH}_4$  oxidation can be further evidenced by



comparing its effects with those of other anions under the same cationic conditions. When  $\text{NH}_4\text{Cl}$  and  $(\text{NH}_4)_2\text{SO}_4$  were added to the soil at concentrations of  $1\ \mu\text{mol}$  and  $10\ \mu\text{mol}\ \text{NH}_4^+$  per gram of fresh weight, respectively, both compounds caused the same level of inhibition on net  $\text{CH}_4$  oxidation. However, the inhibition observed at the lower concentration ( $1\ \mu\text{mol}$ ) was significantly lower than that at the higher concentration ( $10\ \mu\text{mol}$ ) (Adamsen and King, 1993; Bradford et al., 2001a; King and Schnell, 1998).  $\text{NH}_4^+$  has been found to inhibit  $\text{CH}_4$  oxidation (Bronson and Mosier, 1994; Dunfield and Knowles, 1995). However, the inhibitory effect of  $\text{NH}_4\text{Cl}$  is greater than that of  $(\text{NH}_4)_2\text{SO}_4$ , as  $\text{SO}_4^{2-}$  may enhance the adsorption of  $\text{NH}_4^+$  onto cation exchange sites in the soil (Bradford et al., 2001b; Gulledge and Schimel, 1998; King and Schnell, 1998). This reduced availability of  $\text{NH}_4^+$  to compete with methanotrophs for MMO enzymes further intensifies the inhibitory effect of  $\text{NH}_4\text{Cl}$  compared to  $(\text{NH}_4)_2\text{SO}_4$ . In conclusion,  $\text{SO}_4^{2-}$  served as a facilitator of  $\text{CH}_4$  oxidation, mitigating the inhibitory effects of  $\text{NH}_4^+$  on this process. Benstead and King (2001) observed that, under equivalent soil acidic conditions,  $\text{HNO}_3$  exerted a greater inhibitory effect on  $\text{CH}_4$  oxidation than  $\text{H}_2\text{SO}_4$ . Similar results have been reported by Bradford et al. (2001a), who experimentally confirmed the inhibitory effect of nitrate ( $\text{NO}_3^-$ ) on  $\text{CH}_4$  oxidation (Dunfield and Knowles, 1995; Wang and Ineson, 2003). When  $\text{H}_2\text{SO}_4$  and  $\text{HNO}_3$  were added to the soil to achieve  $\text{H}^+$  concentrations of  $10$  and  $1\ \mu\text{mol}\ \text{H}^+$  per gram of fresh weight (gfw), respectively, both acids inhibited  $\text{CH}_4$  oxidation to a similar extent, albeit with  $\text{H}_2\text{SO}_4$  exhibiting a lesser inhibitory effect than  $\text{HNO}_3$ . We hypothesize that  $\text{SO}_4^{2-}$  may promote  $\text{CH}_4$  oxidation, as evidenced by the findings of Benstead and King (2001) and Bradford et al. (2001a). Consequently, when  $\text{H}_2\text{SO}_4$  and  $\text{HNO}_3$  are added to the soil, resulting in equivalent acidic conditions, the inhibitory effect of  $\text{H}_2\text{SO}_4$  is less pronounced than that of  $\text{HNO}_3$ . Nonetheless, future experiments are required to verify the direct effect of  $\text{SO}_4^{2-}$  on  $\text{CH}_4$  oxidation.

Bradford et al. (2001a) observed no significant difference in  $\text{CH}_4$  oxidation between low ( $564\ \mu\text{M}$ ) and high ( $1408\ \mu\text{M}$ ) concentrations of  $\text{H}_2\text{SO}_4$  compared to the control. Another possibility is that the  $\text{H}_2\text{SO}_4$  concentration, relative to the previous study, led





to  $\text{SO}_4^{2-}$  -stimulating  $\text{CH}_4$  oxidation. Alternatively, Bradford et al. (2001a) suggested that the short duration of  $\text{H}_2\text{SO}_4$  addition to the soil might have prevented it from stimulating  $\text{CH}_4$  oxidation (Bradford et al., 2001a). Similarly, Hu et al. (2018) reported no significant effect of  $\text{SO}_4^{2-}$  on  $\text{CH}_4$  oxidation. Due to the scarcity of studies investigating the direct effect of  $\text{SO}_4^{2-}$  on  $\text{CH}_4$  oxidation, no definitive conclusion regarding its impact could be drawn. Therefore, it is necessary to conduct experimental studies to elucidate the influence of  $\text{SO}_4^{2-}$  on  $\text{CH}_4$  oxidation and explore its underlying mechanisms.

250

#### 4 Indirect effects of $\text{SO}_4^{2-}$ on $\text{CH}_4$ oxidation

The influence of  $\text{SO}_4^{2-}$  on  $\text{CH}_4$  oxidation has been relatively understudied in research. Thus, we conducted a literature review focused on studies involving the addition of  $\text{SO}_4^{2-}$ . Our objective was to demonstrate that  $\text{SO}_4^{2-}$  can indirectly influence  $\text{CH}_4$  oxidation through its effects on soil physicochemical properties and changes in other soil constituents. Indeed, our review uncovered several significant findings that support this hypothesis.  $\text{CH}_4$  oxidation is influenced by various environmental factors (Kou et al., 2017; Shukla et al., 2013), including  $\text{SO}_4^{2-}$ . However,  $\text{SO}_4^{2-}$  may affect  $\text{CH}_4$  oxidation directly (Fig. 2 path c), stemming from variations in methanotrophs activity and community structure in response to  $\text{SO}_4^{2-}$  (Fig. 2 path e) (Bradford et al., 2001b; Sitaula et al., 1995). Alternatively, it may affect  $\text{CH}_4$  oxidation indirectly by influencing soil physical properties (Fan et al., 2017), microbial substrates (Bjorneras et al., 2019; Palmer et al., 2013; Xu et al., 2017), soil nutrition content (Islam, 2012), and soil bacterial metabolism (Hu et al., 2013; Lv et al., 2014; Sogn and Abrahamsen, 1998; Veraart et al., 2015) (Fig. 2).

260

265

First, the addition of  $\text{SO}_4^{2-}$  altered soil physical properties (Fig. 2 path a), i.e., specifically reducing soil pH (Fig. 2 path ①) (Fasth et al., 1991; Tie et al., 2020) and elevating soil redox potential (Eh) and soil oxidation capacity (OC) (Fig. 2 path ②) (Fan et al., 2017). An increase in soil acidification, resulting from the augmented base

270



cation leaching associated with  $\text{SO}_4^{2-}$  addition (Hu et al., 2013), led to a decrease in the pH of forest soils (Fasth et al., 1991; Tie et al., 2020). Generally,  $\text{CH}_4$  consumption is greater at higher pH conditions in general forest soils (Brumme and Borken, 1999; Silver et al., 1999). Therefore, the reduction in soil pH due to  $\text{SO}_4^{2-}$  addition may result in a decrease in  $\text{CH}_4$  oxidation. However, in acidic soils, a decrease in pH has been observed to increase  $\text{CH}_4$  oxidation (Sitaula et al., 1995). Consequently, when considering the impact of  $\text{SO}_4^{2-}$  addition on  $\text{CH}_4$  oxidation, it is crucial to account for the acid-base status of the study soils (Fig. 2 path i), as methanotrophs exhibit different pH preferences in acidic and alkaline environments (Shukla et al., 2013).  $\text{SO}_4^{2-}$  addition has been found to increase soil Eh and soil OC in subtropical forest soil (Fan et al., 2017). Furthermore, the amount of  $\text{O}_2$  in the soil was closely correlated with soil Eh, and a decrease in  $\text{O}_2$  content can lead to a reduction in soil Eh (Zausig et al., 1993). Therefore, an increase in  $\text{O}_2$  content results in an elevation of soil Eh (Fig. 2 path g). Methanotrophs are obligate aerobes (Teh et al., 2005), requiring MMO to bind  $\text{O}_2$  for the initial step of  $\text{CH}_4$  oxidation (Mancinelli, 1995; Shukla et al., 2013). Additionally,  $\text{CH}_4$  oxidation exhibited a significant positive correlation with  $\text{O}_2$  levels (Mancinelli, 1995). Consequently, the increase in soil Eh and OC, resulting from the elevated  $\text{O}_2$  content due to  $\text{SO}_4^{2-}$  addition, may enhance  $\text{CH}_4$  oxidation (Fig. 2 path h).

Second,  $\text{SO}_4^{2-}$  could alter the soil microbial substrate (Fig. 2 path b), specifically by decreasing soil DOC concentration (Fig. 2 path ③) (Bjorneras et al., 2019; Palmer et al., 2013) and di-O-alkyl C content (Fig. 2 path ④) (Xu et al., 2017). Sullivan et al. (2013) reported that DOC stimulates  $\text{CH}_4$  oxidation in semiarid soils; however,  $\text{SO}_4^{2-}$  addition reduces DOC concentrations (Bjorneras et al., 2019; Palmer et al., 2013). Consequently, it can be inferred that  $\text{SO}_4^{2-}$  addition may indirectly inhibit  $\text{CH}_4$  oxidation by decreasing soil DOC concentration (Fig. 2 path l). In a subtropical forest,  $\text{SO}_4^{2-}$  addition has been shown to increase the activity of gram-negative bacteria in soil by reducing the litter di-O-alkyl C (Fig. 2 path ④ and j) (Xu et al., 2017). Di-O-alkyl C is a component of SOC. SOC degradation occurs more readily with a higher percentage



300 of di-O-alkyl C (Huang et al., 2021). Conversely, when the content of di-O-alkyl C is low, SOC degradation proceeds relatively slowly in soil, resulting in a greater availability of substrate for utilization by microorganisms, including methanotrophs. Methanotrophs, which are gram-negative bacteria (Schimel and Gulledge, 1998), may experience an increase in activity when  $\text{SO}_4^{2-}$  is added. This enhancement of  
305 methanotrophs activity (Fig. 2 path k), can ultimately promote  $\text{CH}_4$  oxidation (Fig. 2 path q). However, further experiments are required to elucidate the mechanism of how  $\text{SO}_4^{2-}$  affects the activity of methanotrophs.

Third,  $\text{SO}_4^{2-}$  can alter soil nutrition content (Fig. 2 path d), specifically increasing soil  
310 Cu availability (Fig. 2 path ⑤) (Islam, 2012), P content (Fig. 2 path ⑥) by enhancing acid phosphatase activity (Lv et al., 2014; Veraart et al., 2015), and  $\text{Al}^{3+}$  toxicity (Fig. 2 path ⑦) (Hu et al., 2013; Sogn and Abrahamsen, 1998). **Cu is a crucial component in  $\text{CH}_4$  oxidation processes when it is utilized by methanotrophs in their molecular machinery, synthesized from metabolized  $\text{CH}_4$  through the secretion of methanobactin into the environment.** This process facilitates the oxidation of  $\text{CH}_4$  to methanol (Dassama et al., 2016). It was anticipated that methanobactin secreted by methanotrophs during  $\text{CH}_4$  oxidation would facilitate Cu uptake (Knapp et al., 2007); however, the specific mechanism of how methanobactin affects Cu uptake remains unclear (Fig. 2 path n). An increase in Cu availability results in the overexpression of  
320 protein-mediated steps in the conversion of  $\text{CH}_4$  to  $\text{CO}_2$ , including the synthesis of cell walls, lipids, and membranes (DiSpirito et al., 2016). Furthermore, Cu may act as a stimulant for  $\text{CH}_4$  oxidation (Ho et al., 2013). Therefore, the addition of  $\text{SO}_4^{2-}$  may indirectly enhance  $\text{CH}_4$  oxidation by augmenting the availability of soil Cu (Fig. 2 path m). A positive correlation has been found between P and  $\text{CH}_4$  oxidation in soils (Veraart et al., 2015; Zhang et al., 2020). P can potentially enhance the activity of soil  
325 methanotrophs (Fig. 2 path p) (Zhang et al., 2011), with an increase in soil P content achieved through the hydrolysis of organic compounds, including nucleic acids, phospholipids, and phosphate esters, by acid and alkaline phosphatases (Veraart et al.,



2015). The addition of  $\text{SO}_4^{2-}$  accelerated acid phosphatase activity, thereby increasing  
330 soil P content (Lv et al., 2014). Therefore, we hypothesize infer that  $\text{SO}_4^{2-}$  may  
indirectly enhance  $\text{CH}_4$  oxidation through the augmentation of soil P content,  
subsequently promoting the activity of methanotrophs in the soil (Fig. 2 path p and q).  
It is well-established that  $\text{Al}^{3+}$  inhibits  $\text{CH}_4$  oxidation (Tamai et al., 2007; Tamai et al.,  
2003). Additionally, soil acidification resulting from  $\text{SO}_4^{2-}$  addition has been shown to  
335 intensify the toxicity of  $\text{Al}^{3+}$  in forest soils (Hu et al., 2013; Sogn and Abrahamsen,  
1998). We hypothesize that the addition of  $\text{SO}_4^{2-}$  may indirectly inhibit  $\text{CH}_4$  oxidation  
by enhancing the toxicity of soil  $\text{Al}^{3+}$  (Fig. 2 path o).

Finally, the addition of  $\text{SO}_4^{2-}$  alters soil microbial metabolism (Fig. 2 path f),  
340 specifically including an up-regulation of the tricarboxylic acid (TCA) cycle (Fig. 2  
path ⑧) (Wang et al., 2021). Methanotrophs utilize the TCA cycle during the  
metabolism of the serine cycle to assimilate  $\text{CH}_4$  (Trotsenko and Murrell, 2008). A  
decrease in  $\text{CH}_4$  oxidation rates leads to a decline in  $\text{CH}_4$  assimilation (Roslev et al.,  
1997), whereas an increase in  $\text{CH}_4$  assimilation in soils may trigger an up-regulation of  
345 the TCA cycle (Fig. 2 path s). Thus, the observed up-regulation of the TCA cycle  
following  $\text{SO}_4^{2-}$  addition can be attributed to the enhancement of  $\text{CH}_4$  oxidation (Fig. 2  
path c), which subsequently leads to an increase in  $\text{CH}_4$  assimilation (Fig. 2 path r).  
However, the precise mechanisms of how  $\text{SO}_4^{2-}$  ultimately impacts  $\text{CH}_4$  oxidation and  
methanotrophs remain to be experimentally verified.

350

## 5 Implication

The microbiological processes of methanogenesis and  $\text{CH}_4$  oxidation are influenced by  
numerous factors, significantly impacting the global  $\text{CH}_4$  cycle.  $\text{SO}_4^{2-}$  plays a pivotal  
role in global acid deposition, with annual deposition rates ranging from  $141.64 \pm$   
355  $120.04 \text{ TgS a}(\text{year})^{-1}$  (Gao et al., 2022). Various studies have demonstrated that  $\text{SO}_4^{2-}$   
inhibits soil methanogenesis (Eriksson et al., 2010; Granberg. et al., 2001; Schimel,  
2004), reducing  $\text{CH}_4$  emissions.  $\text{SO}_4^{2-}$  also stimulates anaerobic  $\text{CH}_4$  oxidation (Boetius



et al., 2000; Fan et al., 2021; La et al., 2022), enhancing CH<sub>4</sub> consumption and reducing emissions. Nevertheless, there is a scarcity of studies investigating the impact of SO<sub>4</sub><sup>2-</sup> on aerobic CH<sub>4</sub> oxidation. By synthesizing the available literature, we observed that SO<sub>4</sub><sup>2-</sup> enhances CH<sub>4</sub> oxidation by up to 42%, suggesting that increased SO<sub>4</sub><sup>2-</sup> deposition may promote soil CH<sub>4</sub> oxidation, thereby reducing CH<sub>4</sub> emissions to the atmosphere and influencing the CH<sub>4</sub> cycle, ultimately affecting global warming.

## 365 **6 Conclusions**

Upon reviewing recent studies, we concluded that SO<sub>4</sub><sup>2-</sup> promotes CH<sub>4</sub> oxidation and predicted that its definitive impacts on CH<sub>4</sub> oxidation may be observed in the coming decades. Mechanistically, SO<sub>4</sub><sup>2-</sup> can either directly enhance CH<sub>4</sub> oxidation or influence it by modulating the activity of methanotrophs, pH, Eh, soil OC, DOC concentration, di-O-alkyl C amount, Cu availability, P content, Al<sup>3+</sup> toxicity, and the soil TCA cycle. Therefore, SO<sub>4</sub><sup>2-</sup> reduces CH<sub>4</sub> emissions while enhancing its consumption, which is beneficial for CH<sub>4</sub> mitigation in the context of heightened acid deposition. Moreover, the relationship between SO<sub>4</sub><sup>2-</sup> and CH<sub>4</sub> oxidation may be mediated by intermediate substances, specifically, SO<sub>4</sub><sup>2-</sup> affects CH<sub>4</sub> oxidation by modulating methanotrophs or including alterations in other soil components, requiring further experimental validation.

### **Data availability**

All raw data can be provided by the corresponding authors upon request.

## 380 **Author contribution**

Rui Su finished writing; Kexin Li, Nannan Wang, Fenghui Yuan, Yunjiang Zuo, Ying Sun, and Liyuan He gave constructive comments and revised the structure and content of the article; Xiaofeng Xu and Lihua Zhang reviewed and edited the manuscript.

### **Competing interests**

385 The authors declare that they have no conflict of interest.



## Acknowledgments

This study was partially supported by the National Natural Science Foundation of China (32471777; 32271681) and the Joint Funds of China's National Natural Science Foundation (U2006215), and by Key Laboratory of Ecology and Environment in  
390 Minority Areas (Minzu University of China), National Ethnic Affairs Commission (KLEEMA202206). X.X. acknowledged the financial assistance provided by the National Science Foundation (2145130) and SPRUCE and NGEE Arctic projects, supported by the Office of Biological and Environmental Research in the Department  
395 of Energy Office of Science.

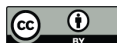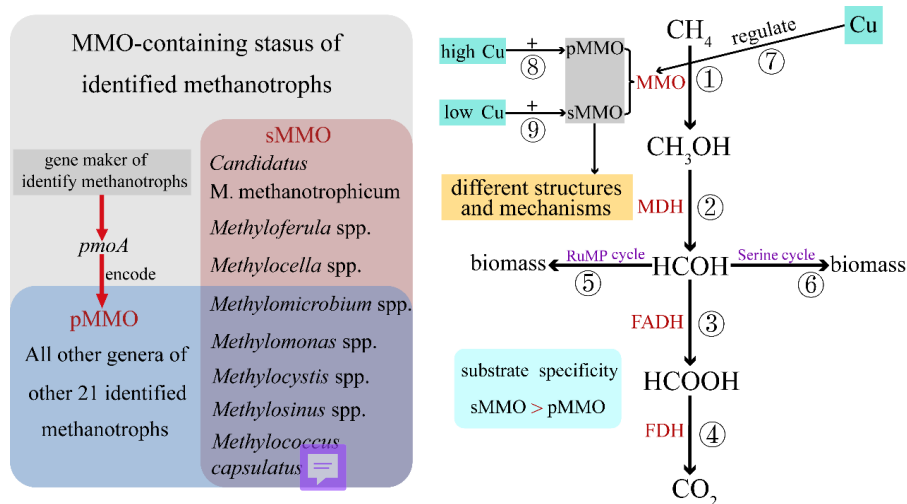

**Figure 1: Diagram of the methane oxidation process and MMO-containing status of identified methanotrophs.** ①  $\text{CH}_4$  is oxidized to methanol ( $\text{CH}_3\text{OH}$ ) by MMO; ②  $\text{CH}_3\text{OH}$  is oxidized to formaldehyde ( $\text{HCOH}$ ) by methanol dehydrogenase (MDH); ③  $\text{HCOH}$  is oxidized to formate ( $\text{HCOOH}$ ) by formaldehyde dehydrogenase (FADH); ④  $\text{HCOOH}$  is oxidized to  $\text{CO}_2$  by formate dehydrogenase (FDH); ⑤  $\text{HCOH}$  is assimilated into cellular biomass via the RuMP cycle; ⑥  $\text{HCOH}$  is assimilated into cellular biomass via the Serine cycle; ⑦  $\text{Cu}$  controls two MMOs expression (Hakemian and Rosenzweig, 2007); ⑧ High  $\text{Cu}$  concentration regulates pMMO expression in soil (Hakemian and Rosenzweig, 2007); ⑨ Low  $\text{Cu}$  concentration regulates sMMO expression in soil (Hakemian and Rosenzweig, 2007). pMMO and sMMO have different structures and mechanisms, and sMMO has broader substrate specificity than pMMO. Most methanotrophs possess pMMO, so the *pmoA* gene is a key gene for detecting methanotrophs in environment samples.

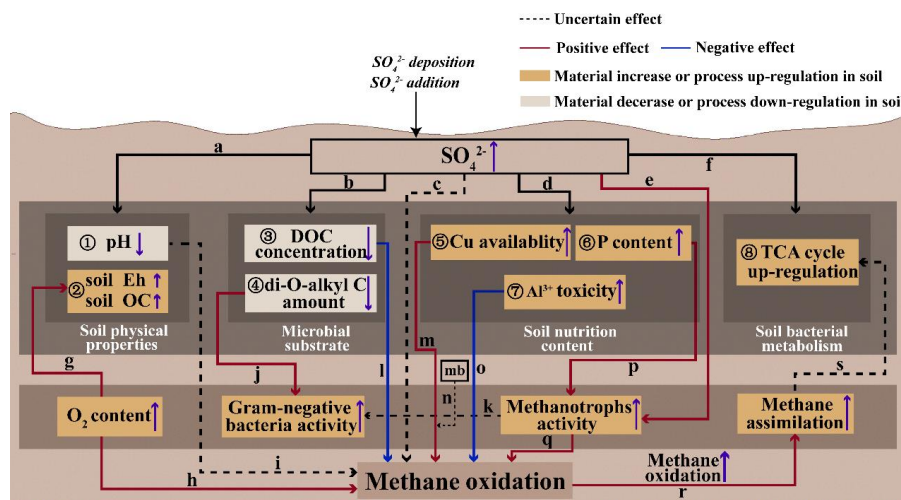

**Figure 2. Conceptual diagram illustrating  $\text{SO}_4^{2-}$  affected  $\text{CH}_4$  oxidation through direct or indirect ways in soil.** ①  $\text{SO}_4^{2-}$  decreases soil pH (Fasth et al., 1991; Tie et al., 2020); ②  $\text{SO}_4^{2-}$  increases soil Eh (redox potential) and soil OC (oxidation capacity) (Fan et al., 2017); ③  $\text{SO}_4^{2-}$  decreases soil DOC concentration (Bjorneras et al., 2019; Palmer et al., 2013); ④  $\text{SO}_4^{2-}$  decreases soil di-O-alkyl C amount (Xu et al., 2017); ⑤  $\text{SO}_4^{2-}$  increases soil Cu availability (Islam, 2012); ⑥  $\text{SO}_4^{2-}$  increases soil P content by increasing soil acid phosphatase activity (Lv et al., 2014; Veraart et al., 2015); ⑦  $\text{SO}_4^{2-}$  increases soil  $\text{Al}^{3+}$  toxicity (Hu et al., 2013; Sogn and Abrahamsen, 1998); ⑧  $\text{SO}_4^{2-}$  induced soil TCA cycle up-regulate (Wang et al., 2021); a. Changes in soil physical properties due to increased soil  $\text{SO}_4^{2-}$  content; b. Changes in soil microbial substrate due to increased soil  $\text{SO}_4^{2-}$  content; c.  $\text{SO}_4^{2-}$  may promote  $\text{CH}_4$  oxidation; d. Changes in soil nutrition content due to increased soil  $\text{SO}_4^{2-}$  content; e.  $\text{SO}_4^{2-}$  affects the activity or community size of methanotrophs in soils (Bradford et al., 2001b; Sitaula et al., 1995); f. Change in soil bacterial metabolism due to increased soil  $\text{SO}_4^{2-}$  content; g. Elevated  $\text{O}_2$  content increases soil Eh (Zausig et al., 1993); h. Elevated  $\text{O}_2$  level stimulates soil  $\text{CH}_4$  oxidation (Mancinelli, 1995); i. Decreased pH may inhibit or stimulate soil  $\text{CH}_4$  oxidation (Sitaula et al., 1995); j. Decreased di-O-alkyl C amount increases soil gram-negative bacteria activity (Xu et al., 2017); k. Increased activity of gram-negative bacteria may increase activity of methanotrophs; l. Decreased DOC concentration may inhibit soil  $\text{CH}_4$  oxidation (Sullivan et al., 2013); m. Elevated Cu availability stimulates soil  $\text{CH}_4$  oxidation (Ho et al., 2013); n. mb (methanobactin) is





435 expected to accelerate Cu uptake (Knapp et al., 2007); o. Elevated Al<sup>3+</sup> toxicity inhibits  
 soil CH<sub>4</sub> oxidation (Tamai et al., 2007; Tamai et al., 2003); p. Elevated P content  
 increases soil methanotrophs activity (Zhang et al., 2011); q. Elevated methanotrophs  
 activity stimulates soil CH<sub>4</sub> oxidation (Bradford et al., 2001b; Sitaula et al., 1995); r.  
 Increased CH<sub>4</sub> oxidation may increase CH<sub>4</sub> assimilation (Roslev et al., 1997); s.  
 440 Methanotrophs undergo the TCA cycle during CH<sub>4</sub> metabolism and may cause up-  
 regulation of the TCA cycle in soil.

| Study site                  | Sulfate concentration                                           | CH <sub>4</sub><br>concentration | Effect         | Reference |
|-----------------------------|-----------------------------------------------------------------|----------------------------------|----------------|-----------|
| Perridge Forest             | H <sub>2</sub> SO <sub>4</sub> (50 Kg S ha <sup>-1</sup> )      | Ambient air                      | 25 % increased | [28]      |
| Perridge Forest             | H <sub>2</sub> SO <sub>4</sub> (5mM)                            | Ambient air                      | no effect      | [30]      |
|                             | (NH <sub>4</sub> ) <sub>2</sub> SO <sub>4</sub> (5mM)           | Ambient air                      | no effect      |           |
| Maine forest                | Na <sub>2</sub> SO <sub>4</sub> 0.5µg S g <sup>-1</sup> soil    | 250ppm                           | 3% increased   | [37]      |
| Norway Scots<br>Pine forest | H <sub>2</sub> SO <sub>4</sub> pH3                              | Ambient air                      | 42% increased  | [29]      |
| Birch taiga                 | Na <sub>2</sub> SO <sub>4</sub> 2.8 µmol S g <sup>-1</sup> soil | 4ppm                             | no effect      | [63]      |
|                             | K <sub>2</sub> SO <sub>4</sub> 2.8 µmol S g <sup>-1</sup> soil  | 4ppm                             | no effect      |           |

**Table 1.** Promotion effect of sulfate on methane oxidation in diverse biome soils.

445

### Reference

- Adamsen, A.P.S., King, G.M., Methane consumption in temperate and subarctic forest  
 soils rates, vertical zonation, and responses to water and nitrogen. *Applied and  
 Environmental Microbiology* 59, 485-490. [http://doi.org/10.1128/aem.59.2.485-  
 490.1993](http://doi.org/10.1128/aem.59.2.485-490.1993), 1993.
- 450 Bjorneras, C., Skerlep, M., Floudas, D., Persson, P., Kritzberg, E.S., High sulfate  
 concentration enhances iron mobilization from organic soil to water.  
*Biogeochemistry* 144, 245-259. <http://doi.org/10.1007/s10533-019-00581-6>, 2019.
- Bodelier, P.L.E., Interactions between nitrogenous fertilizers and methane cycling in  
 wetland and upland soils. *Current Opinion in Environmental Sustainability* 3, 379-  
 455 388. <http://doi.org/10.1016/j.cosust.2011.06.002>, 2011.
- Boetius, A., Ravensschlag, K., Schubert, C., Rickert, D., Widdel, F., Gieseke, A., Amann,  
 R., Jorgensen, B., Witte, U., Pfannkuche, O., A marine microbial consortium  
 apparently mediating anaerobic oxidation of methane. *Nature* 407, 623-626.



- 460 <http://doi.org/10.1038/35036572>, 2000.
- Bowman, J., The Methanotrophs—The families Methylococcaceae and Methylocystaceae, in: Dworkin, M., Falkow, S., Rosenberg, E., Schleifer, K., Stackebrandt, E. (Eds.), *The Prokaryotes*. Springer, New York, NY, pp. 266-289. [http://doi.org/10.1007/0-387-30745-1\\_15](http://doi.org/10.1007/0-387-30745-1_15), 2006.
- 465 Bradford, M.A., Ineson, P., Wookey, P.A., Lappin-Scott, H.M., The effects of acid nitrogen and acid sulphur deposition on CH<sub>4</sub> oxidation in a forest soil: a laboratory study. *Soil Biology and Biochemistry* 33, 1695-1702. [http://doi.org/10.1016/s0038-0717\(01\)00091-8](http://doi.org/10.1016/s0038-0717(01)00091-8), 2001a.
- Bradford, M.A., Wookey, P.A., Ineson, P., Lappin-Scott, H.M., Controlling factors and effects of chronic nitrogen and sulphur deposition on methane oxidation in a temperate forest soil. *Soil Biology and Biochemistry* 33, 93-102. [http://doi.org/10.1016/S0038-0717\(00\)00118-8](http://doi.org/10.1016/S0038-0717(00)00118-8), 2001b.
- 470 Bronson, K.F., Mosier, A.R., Suppression of methane oxidation in aerobic soil by nitrogen fertilizers, nitrification inhibitors, and urease inhibitors. *Biology and Fertility of Soils* 17, 263-268. <http://doi.org/10.1007/bf00383979>, 1994.
- 475 Brumme, R., Borken, W., Site variation in methane oxidation as affected by atmospheric deposition and type of temperate forest ecosystem. *Global Biogeochemical Cycles* 13, 493-501. <http://doi.org/10.1029/1998gb900017>, 1999.
- Cai, Y.F., Yun, J.L., Jia, Z.J., Phylogeny and metabolic potential of the methanotrophic lineage MO3 in Beijerinckiaceae from the paddy soil through metagenome-assembled genome reconstruction. *Microorganisms* 10, 955. <http://doi.org/10.3390/microorganisms10050955>, 2022.
- 480 Chistoserdova, L., Vorholt, J.A., Lidstrom, M.E., A genomic view of methane oxidation by aerobic bacteria and anaerobic archaea. *Genome Biology* 6, 1-6. <http://doi.org/10.1186/gb-2005-6-2-208>, 2005.
- 485 Dassama, L.M., Kenney, G.E., Ro, S.Y., Zielazinski, E.L., Rosenzweig, A.C., Methanobactin transport machinery. *Proceedings of the National Academy of Sciences of the United States of America* 113, 13027-13032. <http://doi.org/10.1073/pnas.1603578113>, 2016.
- 490 Deng, Y., Che, R., Wang, F., Conrad, R., Dumont, M., Yun, J., Wu, Y., Hu, A., Fang, J., Xu, Z., Cui, X., Wang, Y., Upland Soil Cluster Gamma dominates methanotrophic communities in upland grassland soils. *Science of the Total Environment* 670, 826-836. <http://doi.org/10.1016/j.scitotenv.2019.03.299>, 2019.
- 495 DiSpirito, A.A., Semrau, J.D., Murrell, J.C., Gallagher, W.H., Dennison, C., Vuilleumier, S., Methanobactin and the link between copper and bacterial methane oxidation. *Microbiology and Molecular Biology Reviews* 80, 387-409. <http://doi.org/10.1128/membr.00058-15>, 2016.
- Dunfield, P., Knowles, R., Kinetics of inhibition of methane oxidation by nitrate, nitrite, and ammonium in a humisol. *Applied and Environmental Microbiology* 61, 3129-3135. <http://doi.org/10.1128/aem.61.8.3129-3135.1995>, 1995.
- 500 Eriksson, T., Oquist, M.G., Nilsson, M.B., Production and oxidation of methane in a boreal mire after a decade of increased temperature and nitrogen and sulfur deposition. *Global Change Biology* 16, 2130-2144. [18](http://doi.org/10.1111/j.1365-</a></p></div><div data-bbox=)



- 2486.2009.02097.x, 2010.
- 505 Fan, J.L., Xu, Y.H., Chen, Z.M., Xiao, J., Liu, D.Y., Luo, J.F., Bolan, N., Ding, W.X., Sulfur deposition suppressed nitrogen-induced soil N<sub>2</sub>O emission from a subtropical forestland in southeastern China. *Agricultural and Forest Meteorology* 233, 163-170. <http://doi.org/10.1016/j.agrformet.2016.11.017>, 2017.
- 510 Fan, L.C., Schneider, D., Dippold, M.A., Poehlein, A., Wu, W.C., Gui, H., Ge, T.D., Wu, J.S., Thiel, V., Kuzyakov, Y., Dorodnikov, M., Active metabolic pathways of anaerobic methane oxidation in paddy soils. *Soil Biology and Biochemistry* 156, 108215. <http://doi.org/10.1016/j.soilbio.2021.108215>, 2021.
- 515 Fasth, W.J., David, M.B., Vance, G.F., Sulfate retention and cation leaching of forest soils in response to acid additions. *Canadian Journal of Forest Research* 21, 32-41. <http://doi.org/10.1139/x91-005>, 1991.
- Fenibo, E.O., Selvarajan, R., Wang, H.Q., Wang, Y., Abia, A.L.K., Untapped talents: insight into the ecological significance of methanotrophs and its prospects. *Science of the Total Environment* 903, 166145. <http://doi.org/10.1016/j.scitotenv.2023.166145>, 2023.
- 520 Gao, J., Zhou, W., Liu, Y., Sha, L., Song, Q., Lin, Y., Yu, G., Zhang, J., Zheng, X., Fang, Y., Grace, J., Zhao, J., Xu, J., Gui, H., Sinclair, F., Zhang, Y., Litter-derived nitrogen reduces methane uptake in tropical rainforest soils. *Science of the Total Environment* 849, 157891. <http://doi.org/10.1016/j.scitotenv.2022.157891>, 2022.
- 525 Gauci, V., Matthews, E., Dise, N., Walter, B., Koch, D., Granberg, G., Vile, M., Sulfur pollution suppression of the wetland methane source in the 20th and 21st centuries. *Proceedings of the National Academy of Sciences of the United States of America* 101, 12583-12587. <http://doi.org/10.1073/pnas.0404412101>, 2004.
- 530 Granberg, G., Sund, I., Svensson, B.H., Nilsson, M., Effect of temperature, and nitrogen and sulfur deposition, on methane emission from a boreal mire. *Ecology* 82, 1982-1998. 2001.
- Gulledge, J., Schimel, J., Low-concentration kinetics of atmospheric CH<sub>4</sub> oxidation in soil and mechanism of NH<sub>4</sub><sup>+</sup> inhibition. *Applied and Environmental Microbiology* 64, 4291-4298. 1998.
- 535 Guo, J.H., Feng, H.L., Peng, C.H., Chen, H., Xu, X., Ma, X.H., Li, L., Kneeshaw, D., Ruan, H.H., Yang, H.Q., Wang, W.F., Global climate change increases terrestrial soil CH<sub>4</sub> emissions. *Global Biogeochemical Cycles* 37, e2021GB007255. <http://doi.org/10.1029/2021gb007255>, 2023.
- 540 Hakemian, A.S., Rosenzweig, A.C., The biochemistry of methane oxidation. *Annual Review of Biochemistry* 76, 223-241. <http://doi.org/10.1146/annurev.biochem.76.061505.175355>, 2007.
- Hanson, R.S., Hanson, T.E., Methanotrophic bacteria. *Microbiological Reviews* 60, 439-471. <http://doi.org/10.1128/membr.60.2.439-471.1996>, 1996.
- 545 Ho, A., Lee, H.J., Reumer, M., Meima-Franke, M., Raaijmakers, C., Zweepers, H., de Boer, W., Van der Putten, W.H., Bodelier, P.L.E., Unexpected role of canonical aerobic methanotrophs in upland agricultural soils. *Soil Biology and Biochemistry* 131, 1-8. <http://doi.org/10.1016/j.soilbio.2018.12.020>, 2019.
- Ho, A., Lüke, C., Reim, A., Frenzel, P., Selective stimulation in a natural community of



- methane oxidizing bacteria: effects of copper on *pmoA* transcription and activity. *Soil Biology and Biochemistry* 65, 211-216.  
550 <http://doi.org/10.1016/j.soilbio.2013.05.027>, 2013.
- Hu, Y.L., Jung, K., Zeng, D.H., Chang, S.X., Nitrogen- and sulfur-deposition-altered soil microbial community functions and enzyme activities in a boreal mixedwood forest in western Canada. *Canadian Journal of Forest Research* 43, 777-784.  
<http://doi.org/10.1139/cjfr-2013-0049>, 2013.
- 555 Huang, J., Zhou, K.J., Zhang, W., Liu, J.X., Ding, X., Cai, X.A., Mo, J.M., Sulfur deposition still contributes to forest soil acidification in the Pearl River Delta, South China, despite the control of sulfur dioxide emission since 2001. *Environmental Science and Pollution Research* 26, 12928-12939.  
<http://doi.org/10.1007/s11356-019-04831-w>, 2019.
- 560 Huang, R.L., Crowther, T.W., Sui, Y.Y., Sun, B., Liang, Y.T., High stability and metabolic capacity of bacterial community promote the rapid reduction of easily decomposing carbon in soil. *Communications Biology* 4, 1376.  
<http://doi.org/10.1038/s42003-021-02907-3>, 2021.
- Islam, M., The effect of different rates and forms of sulfur on seed yield and micronutrient uptake by chickpea. *Plant, Soil and Environment* 58, 399-404.  
565 <http://doi.org/10.17221/145/2012-pse>, 2012.
- Jang, I., Lee, S., Zoh, K.-D., Kang, H., Methane concentrations and methanotrophic community structure influence the response of soil methane oxidation to nitrogen content in a temperate forest. *Soil Biology and Biochemistry* 43, 620-627.  
570 <http://doi.org/10.1016/j.soilbio.2010.11.032>, 2011.
- Jeremiason, J.D., Engstrom, D.R., Swain, E.B., Nater, E.A., Johnson, B.M., Almendinger, J.E., Monson, B.A., Kolka, R.K., Sulfate addition increases methylmercury production in an experimental wetland. *Environmental Science & Technology* 40, 3800-3806. <http://doi.org/10.1021/es0524144>, 2006.
- 575 King, G.M., Schnell, S., Effects of ammonium and non-ammonium salt additions on methane oxidation by *Methylosinus trichosporium* OB3b and Maine forest soils. *Applied and Environmental Microbiology* 64, 253-257. 1998.
- Klessa, D.A., Frame, J., Golightly, R.D., Harkess, R.D., THE EFFECT OF FERTILIZER SULFUR ON GRASS PRODUCTION FOR SILAGE. *Grass and Forage Science* 44, 277-281. <http://doi.org/10.1111/j.1365-2494.1989.tb02165.x>,  
580 1989.
- Knapp, C.W., Fowle, D.A., Kulczycki, E., Roberts, J.A., Graham, D.W., Methane monooxygenase gene expression mediated by methanobactin in the presence of mineral copper sources. *Proceedings of the National Academy of Sciences of the United States of America* 104, 12040-12045.  
585 <http://doi.org/10.1073/pnas.0702879104>, 2007.
- Koo, C.W., Rosenzweig, A.C., Biochemistry of aerobic biological methane oxidation. *Chemical Society Review* 50, 3424-3436. <http://doi.org/10.1039/d0cs01291b>,  
2021.
- 590 Kou, Y.P., Li, J.B., Wang, Y.S., Li, C.N., Tu, B., Yao, M.J., Li, X.Z., Scale-dependent key drivers controlling methane oxidation potential in Chinese grassland soils. *Soil*



- Biology and Biochemistry 111, 104-114.  
<http://doi.org/10.1016/j.soilbio.2017.04.005>, 2017.
- 595 La, W., Han, X., Liu, C.Q., Ding, H., Liu, M., Sun, F., Li, S., Lang, Y., Sulfate concentrations affect sulfate reduction pathways and methane consumption in coastal wetlands. *Water Research* 217, 118441. <http://doi.org/10.1016/j.watres.2022.118441>, 2022.
- Le Mer, J., Roger, P., Production, oxidation, emission and consumption of methane by soil: a review. *European Journal of Soil Biology* 37, 25-50. [http://doi.org/10.1016/S1164-5563\(01\)01067-6](http://doi.org/10.1016/S1164-5563(01)01067-6), 2001.
- 600 Li, C.H., Wang, B., Fang, Z., Yu, H.L., Huang, J.Y., Plant species diversity is driven by soil base cations under acid deposition in desert coal-mining region in northwestern China. *Ecological Indicators* 145, 109682. <http://doi.org/10.1016/j.ecolind.2022.109682>, 2022.
- 605 Li, Y., Liu, Y.W., Pan, H., Hernández, M., Guan, X.M., Wang, W., Zhang, Q.C., Luo, Y., Di, H.J., Xu, J.M., Impact of grazing on shaping abundance and composition of active methanotrophs and methane oxidation activity in a grassland soil. *Biology and Fertility of Soils* 56, 799-810. <http://doi.org/10.1007/s00374-020-01461-0>, 2020.
- 610 Liu, L., Greaver, T.L., A review of nitrogen enrichment effects on three biogenic GHGs: the CO<sub>2</sub> sink may be largely offset by stimulated N<sub>2</sub>O and CH<sub>4</sub> emission. *Ecology Letters* 12, 1103-1117. <http://doi.org/10.1111/j.1461-0248.2009.01351.x>, 2009.
- 615 Lv, Y., Wang, C.Y., Jia, Y.Y., Wang, W.W., Ma, X., Du, J.J., Pu, G.Z., Tian, X.J., Effects of sulfuric, nitric, and mixed acid rain on litter decomposition, soil microbial biomass, and enzyme activities in subtropical forests of China. *Applied Soil Ecology* 79, 1-9. <http://doi.org/10.1016/j.apsoil.2013.12.002>, 2014.
- Mancinelli, R., The regulation of methane oxidation in soil. *Annual Review of Microbiology* 49, 581-605. 1995.
- 620 Mohanty, S.R., Bodelier, P.L., Conrad, R., Effect of temperature on composition of the methanotrophic community in rice field and forest soil. *FEMS Microbiology Ecology* 62, 24-31. <http://doi.org/10.1111/j.1574-6941.2007.00370.x>, 2007.
- Munthe, J., Bodaly, R.A., Branfireun, B.A., Driscoll, C.T., Gilmour, C.C., Harris, R., Horvat, M., Lucotte, M., Malm, O., Recovery of mercury-contaminated fisheries. *Ambio* 36, 33-44. [http://doi.org/10.1579/0044-7447\(2007\)36\[33:Romf\]2.0.Co;2](http://doi.org/10.1579/0044-7447(2007)36[33:Romf]2.0.Co;2), 2007.
- 625 Murguía-Flores, F., Arndt, S., Ganesan, A.L., Murray-Tortarolo, G., Hornibrook, E.R.C., Soil Methanotrophy Model (MeMo v1.0): a process-based model to quantify global uptake of atmospheric methane by soil. *Geoscientific Model Development* 11, 2009-2032. <http://doi.org/10.5194/gmd-11-2009-2018>, 2018.
- 630 Murguía-Flores, F., Ganesan, A.L., Arndt, S., Hornibrook, E.R.C., Global uptake of atmospheric methane by soil from 1900 to 2100. *Global Biogeochemical Cycles* 35, e2020GB006774. <http://doi.org/10.1029/2020gb006774>, 2021.
- 635 Nanba, K., King, G., Response of atmospheric methane consumption by maine forest soils to exogenous aluminum salts. *Applied and Environmental Microbiology* 66, 3674-3679. <http://doi.org/10.1128/AEM.66.9.3674-3679.2000>, 2000.



- Op den Camp, H.J., Islam, T., Stott, M.B., Harhangi, H.R., Hynes, A., Schouten, S.,  
Jetten, M.S., Birkeland, N.K., Pol, A., Dunfield, P.F., Environmental, genomic and  
taxonomic perspectives on methanotrophic *Verrucomicrobia*. Environmental  
Microbiology Reports 1, 293-306. <http://doi.org/10.1111/j.1758-2229.2009.00022.x>, 2009.
- 640 Palmer, S.M., Clark, J.M., Chapman, P.J., van der Heijden, G.M.F., Bottrell, S.H.,  
Effects of acid sulphate on DOC release in mineral soils: the influence of  $\text{SO}_4^{2-}$   
retention and Al release. European Journal of Soil Science 64, 537-544.  
<http://doi.org/10.1111/ejss.12048>, 2013.
- 645 Place, S.E., Examining the role of ruminants in sustainable food systems. Grass and  
Forage Science 79, 135-143. <http://doi.org/10.1111/gfs.12673>, 2024.
- Praeg, N., Wagner, A.O., Illmer, P., Plant species, temperature, and bedrock affect net  
methane flux out of grassland and forest soils. Plant and Soil 410, 193-206.  
<http://doi.org/10.1007/s11104-016-2993-z>, 2016.
- 650 Pratscher, J., Vollmers, J., Wiegand, S., Dumont, M.G., Kaster, A.-K., Unravelling the  
identity, metabolic potential and global biogeography of the atmospheric methane-  
oxidizing upland soil cluster  $\alpha$ . Environmental Microbiology 20, 1016-1029.  
<http://doi.org/10.1111/1462-2920.14036>, 2018.
- Prietzl, J., Mayer, B., Legge, A.H., Cumulative impact of 40 years of industrial sulfur  
emissions on a forest soil in west-central Alberta (Canada). Environmental  
Pollution 132, 129-144. <http://doi.org/10.1016/j.envpol.2004.03.016>, 2004.
- 655 Roslev, P., Iversen, N., Henriksen, K., Oxidation and assimilation of atmospheric  
methane by soil methane oxidizers. Applied and Environmental Microbiology 63,  
874-880. <http://doi.org/10.1128/aem.63.3.874-880.1997>, 1997.
- 660 Schimel, J., Playing scales in the methane cycle: from microbial ecology to the globe.  
Proceedings of the National Academy of Sciences of the United States of America  
101, 12400-12401. <http://doi.org/10.1073/pnas.0405075101>, 2004.
- Schimel, J., Gullede, J., Microbial community structure and global trace gases. Global  
Change Biology 4, 745-758. <http://doi.org/10.1046/j.1365-2486.1998.00195.x>,  
665 1998.
- Schmitz, R.A., Peeters, S.H., Versantvoort, W., Picone, N., Pol, A., Jetten, M.S.M., Op  
den Camp, H.J.M., Verrucomicrobial methanotrophs: ecophysiology of  
metabolically versatile acidophiles. FEMS Microbiology Reviews 45, fuab007.  
<http://doi.org/10.1093/femsre/fuab007>, 2021.
- 670 Schnell, S., King, G.M., Mechanistic analysis of ammonium inhibition of atmospheric  
methane consumption in forest soils. Applied and Environmental Microbiology 60,  
3514-3521. <http://doi.org/10.1128/aem.60.10.3514-3521.1994>, 1994.
- Shukla, P.N., Pandey, K.D., Mishra, V.K., Environmental determinants of soil methane  
oxidation and methanotrophs. Critical Reviews in Environmental Science and  
Technology 43, 1945-2011. <http://doi.org/10.1080/10643389.2012.672053>, 2013.
- 675 Silver, W.L., Lugo, A.E., Keller, M., Soil oxygen availability and biogeochemistry  
along rainfall and topographic gradients in upland wet tropical forest soils.  
Biogeochemistry 44, 301-328. <http://doi.org/10.1007/bf00996995>, 1999.
- Singh, B.K., Bardgett, R.D., Smith, P., Reay, D.S., Microorganisms and climate change:



- 680 terrestrial feedbacks and mitigation options. *Nature Reviews Microbiology* 8, 779-790. <http://doi.org/10.1038/nrmicro2439>, 2010.
- Sitaula, B.K., Bakken, L.R., Abrahamsen, G., CH<sub>4</sub> uptake by temperate forest soil: effect of N input and soil acidification. *Soil Biology and Biochemistry* 27, 870-880. [http://doi.org/10.1016/0038-0717\(95\)00017-9](http://doi.org/10.1016/0038-0717(95)00017-9), 1995.
- 685 Sogn, T., Abrahamsen, G., Effects of N and S deposition on leaching from an acid forest soil and growth of Scots pine (*Pinus sylvestris* L.) after 5 years of treatment. *Forest Ecology and Management* 103, 177-190. [http://doi.org/10.1016/S0378-1127\(97\)00188-6](http://doi.org/10.1016/S0378-1127(97)00188-6), 1998.
- Sullivan, B.W., Selmants, P.C., Hart, S.C., Does dissolved organic carbon regulate biological methane oxidation in semiarid soils? *Glob Chang Biol* 19, 2149-2157. <http://doi.org/10.1111/gcb.12201>, 2013.
- 690 Tamai, N., Takenaka, C., Ishizuka, S., Water-soluble Al inhibits methane oxidation at atmospheric concentration levels in Japanese forest soil. *Soil Biology and Biochemistry* 39, 1730-1736. <http://doi.org/10.1016/j.soilbio.2007.01.029>, 2007.
- 695 Tamai, N., Takenaka, C., Ishizuka, S., Tezuka, T., Methane flux and regulatory variables in soils of three equal-aged Japanese cypress (*Chamaecyparis obtusa*) forests in central Japan. *Soil Biology and Biochemistry* 35, 633-641. [http://doi.org/10.1016/s0038-0717\(03\)00010-5](http://doi.org/10.1016/s0038-0717(03)00010-5), 2003.
- Tate, K.R., Soil methane oxidation and land-use change - from process to mitigation. *Soil Biology and Biochemistry* 80, 260-272. <http://doi.org/10.1016/j.soilbio.2014.10.010>, 2015.
- 700 Teh, Y.A., Silver, W.L., Conrad, M.E., Oxygen effects on methane production and oxidation in humid tropical forest soils. *Global Change Biology* 11, 1283-1297. <http://doi.org/10.1111/j.1365-2486.2005.00983.x>, 2005.
- 705 Tie, L.H., Fu, R., Penuelas, J., Sardans, J., Zhang, S.B., Zhou, S.X., Hu, J.X., Huang, C.D., The additions of nitrogen and sulfur synergistically decrease the release of carbon and nitrogen from litter in a subtropical forest. *Forests* 11, 1280. <http://doi.org/10.3390/f11121280>, 2020.
- Trotsenko, Y.A., Murrell, J.C., Metabolic aspects of aerobic obligate methanotrophy. *Advances in Applied Microbiology* 63, 183-229. [http://doi.org/10.1016/S0065-2164\(07\)00005-6](http://doi.org/10.1016/S0065-2164(07)00005-6), 2008.
- 710 van Spanning, R.J.M., Guan, Q., Melkonian, C., Gallant, J., Polerecky, L., Flot, J.F., Brandt, B.W., Braster, M., Iturbe Espinoza, P., Aerts, J.W., Meima-Franke, M.M., Piersma, S.R., Bunduc, C.M., Ummels, R., Pain, A., Fleming, E.J., van der Wel, N.N., Gherman, V.D., Sarbu, S.M., Bodelier, P.L.E., Bitter, W., Methanotrophy by a Mycobacterium species that dominates a cave microbial ecosystem. *Nature Microbiology* 7, 2089-2100. <http://doi.org/10.1038/s41564-022-01252-3>, 2022.
- 715 Veraart, A.J., Steenbergh, A.K., Ho, A., Kim, S.Y., Bodelier, P.L.E., Beyond nitrogen: the importance of phosphorus for CH<sub>4</sub> oxidation in soils and sediments. *Geoderma* 259-260, 337-346. <http://doi.org/10.1016/j.geoderma.2015.03.025>, 2015.
- 720 Wang, M., Wang, L., Shi, H., Liu, Y., Chen, S., Soil bacteria, genes, and metabolites stimulated during sulfur cycling and cadmium mobilization under sodium sulfate stress. *Environmental Research* 201, 111599.



- <http://doi.org/10.1016/j.envres.2021.111599>, 2021.
- 725 Wang, Q., Kwak, J.-H., Choi, W.-J., Chang, S.X., Decomposition of trembling aspen leaf litter under long-term nitrogen and sulfur deposition: effects of litter chemistry and forest floor microbial properties. *Forest Ecology and Management* 412, 53-61. <http://doi.org/10.1016/j.foreco.2018.01.042>, 2018.
- 730 Wang, Z.P., Ineson, P., Methane oxidation in a temperate coniferous forest soil: effects of inorganic N. *Soil Biology and Biochemistry* 35, 427-433. [http://doi.org/10.1016/s0038-0717\(02\)00294-8](http://doi.org/10.1016/s0038-0717(02)00294-8), 2003.
- Xu, Y.H., Fan, J.L., Ding, W.X., Gunina, A., Chen, Z.M., Bol, R., Luo, J.F., Bolan, N., Characterization of organic carbon in decomposing litter exposed to nitrogen and sulfur additions: links to microbial community composition and activity. *Geoderma* 286, 116-124. <http://doi.org/10.1016/j.geoderma.2016.10.032>, 2017.
- 735 Yang, C., Chen, Y.T., Zhang, Q., Qie, X.H., Chen, J.X., Che, Y.J., Lv, D.T., Xu, X.Y., Gao, Y.X., Wang, Z.Y., Sun, J., Mechanism of microbial regulation on methane metabolism in saline-alkali soils based on metagenomics analysis. *Journal of Environmental Management* 345, 118771. <http://doi.org/10.1016/j.jenvman.2023.118771>, 2023.
- 740 Yun, J., Zhuang, G., Ma, A., Guo, H., Wang, Y., Zhang, H., Community structure, abundance, and activity of methanotrophs in the Zoige wetland of the Tibetan Plateau. *Microbial Ecology* 63, 835-843. <http://doi.org/10.1007/s00248-011-9981-x>, 2012.
- 745 Zausig, J., Stepniewski, W., Horn, R., Oxygen concentration redox potential gradients in unsaturated model soil aggregates. *Soil Science Society of America Journal* 57, 908-916. <http://doi.org/10.2136/sssaj1993.03615995005700040005x>, 1993.
- 750 Zhang, L.H., Yuan, F.H., Bai, J.H., Duan, H.T., Gu, X.Y., Hou, L.Y., Huang, Y., Yang, M.G., He, J.S., Zhang, Z.H., Yu, L.J., Song, C.C., Lipson, D.A., Zona, D., Oechel, W., Janssens, I.A., Xu, X.F., Phosphorus alleviation of nitrogen-suppressed methane sink in global grasslands. *Ecology Letters* 23, 821-830. <http://doi.org/10.1111/ele.13480>, 2020.
- 755 Zhang, T., Zhu, W., Mo, J., Liu, L., Dong, S., Increased phosphorus availability mitigates the inhibition of nitrogen deposition on CH<sub>4</sub> uptake in an old-growth tropical forest, southern China. *Biogeosciences* 8, 2805-2813. <http://doi.org/10.5194/bg-8-2805-2011>, 2011.
